# Supplementary material for: Entropy of Simulated Liquids Using Multiscale Cell Correlation
Source: PubMed Central journal article supplement (PMC7515279; doi:10.3390/e21080750), 2019-07-31
Supplement: entropy-21-00750-s001.pdf [file entropy-21-00750-s001.pdf]

**Supplementary Information for**  
**Entropy of Simulated Liquids Using Multiscale Cell Correlation**  
 by Hafiz Saqib Ali, Jonathan Higham and Richard H Henchman

Table S1. Symmetry Number for Each Molecule

| Liquid          | $\sigma$ | Axes number | Liquid            | $\sigma$ | Axes number |
|-----------------|----------|-------------|-------------------|----------|-------------|
| acetic acid     | 1        | 3           | formic acid       | 2        | 3           |
| acetone         | 2        | 3           | furan             | 2        | 3           |
| acetonitrile    | 1        | 2           | hexane            | 2        | 3           |
| ammonia         | 3        | 3           | hexanol           | 1        | 3           |
| aniline         | 2        | 3           | hydrazine         | 2        | 2           |
| benzene         | 12       | 3           | hydrogen peroxide | 2        | 3           |
| benzyl alcohol  | 2        | 3           | hydrogen sulfide  | -        | 0           |
| benzaldehyde    | 2        | 3           | methane           | -        | 0           |
| butane          | 2        | 3           | methanethiol      | 1        | 2           |
| butanol         | 1        | 3           | methanol          | 1        | 2           |
| 2-butoxyethanol | 1        | 3           | methylamine       | 1        | 2           |
| carbon dioxide  | 2        | 2           | NMA               | 1        | 3           |
| chloroform      | 3        | 3           | octanol           | 1        | 3           |
| cyclohexane     | 6        | 3           | pentane           | 2        | 3           |
| diazene         | 2        | 2           | pentanol          | 2        | 3           |
| dichloromethane | 2        | 3           | piperidine        | 1        | 3           |
| diethanolamine  | 2        | 3           | propane           | 2        | 3           |
| diethyl ether   | 2        | 3           | propanol          | 1        | 3           |
| DMFA            | 1        | 3           | pyridine          | 2        | 3           |
| DMSO            | 2        | 3           | styrene           | 1        | 3           |
| 1,4-dioxane     | 2        | 3           | TBA               | 3        | 3           |
| ethane          | 2        | 2           | TFE               | 4        | 3           |
| ethanol         | 1        | 3           | tetrahydrofuran   | 1        | 3           |
| ethene          | 2        | 2           | toluene           | 2        | 3           |
| ethyl acetate   | 1        | 3           | triethylamine     | 3        | 3           |
| ethylamine      | 1        | 3           | m-xylene          | 2        | 3           |
| ethylene glycol | 2        | 3           | o-xylene          | 2        | 3           |
| formamide       | 1        | 3           | p-xylene          | 4        | 3           |

Table S2. Experimental Data to Calculate Liquid-Phase Entropy

| Molecule      | $S_{\text{gas, bp}} / \text{J K}^{-1} \text{mol}^{-1}$ | $\Delta H_{\text{vap}} / \text{kJ mol}^{-1}$ | $C_{\text{P,gas}} / \text{J K}^{-1} \text{mol}^{-1}$ | $P_{\text{vap}} / \text{kPa}$ | Equation                                                                                                                                       |
|---------------|--------------------------------------------------------|----------------------------------------------|------------------------------------------------------|-------------------------------|------------------------------------------------------------------------------------------------------------------------------------------------|
| ethylamine    | 284.8 <sup>b</sup>                                     | 28.0 <sup>a</sup>                            | 72.6 <sup>b</sup>                                    |                               | $S_{\text{liq}}^{\circ} = S_{\text{gas}}^{\circ} + C_{\text{P}} \ln \frac{T_{\text{vap}}}{298} - \frac{\Delta H_{\text{vap}}}{T_{\text{vap}}}$ |
| triethylamine | 405.4 <sup>b</sup>                                     | 35.1 <sup>a</sup>                            |                                                      | 7.66 <sup>a</sup>             | $S_{\text{liq}}^{\circ} = S_{\text{gas}}^{\circ} + R \ln \frac{100}{P_{\text{vap}}} - \frac{\Delta H_{\text{vap}}}{298}$                       |

<sup>a</sup> Ref 1.

<sup>b</sup> Ref 2.

Table S3. MCC Entropy Components ( $\text{J K}^{-1} \text{mol}^{-1}$ ) for OPLS and GAFF

| Liquid            | $S_M^{\text{transvib}}$ |      | $S_M^{\text{rovib}}$ |      | $S_M^{\text{topo}}$ |      | $S_{\text{UA}}^{\text{transvib}}$ |      | $S_{\text{UA}}^{\text{rovib}}$ |      | $S_{\text{IIA}}^{\text{topo}}$ |      |
|-------------------|-------------------------|------|----------------------|------|---------------------|------|-----------------------------------|------|--------------------------------|------|--------------------------------|------|
|                   | OPLS                    | GAFF | OPLS                 | GAFF | OPLS                | GAFF | OPLS                              | GAFF | OPLS                           | GAFF | OPLS                           | GAFF |
| acetic acid       | 58.3                    | 58.5 | 52.0                 | 51.8 | 30.0                | 29.5 | 6.7                               | 12.2 | 29.6                           | 28.2 |                                |      |
| acetone           | 65.4                    | 67.3 | 58.3                 | 59.5 | 25.2                | 23.5 | 7.4                               | 11.3 | 45.9                           | 44.7 |                                |      |
| acetonitrile      |                         | 63.9 |                      | 38.7 |                     | 16.0 |                                   | 1.2  |                                | 22.7 |                                |      |
| ammonia           | 34.8                    | 41.7 | 14.5                 | 20.4 | 22.0                | 21.1 |                                   |      |                                |      |                                |      |
| aniline           | 66.7                    | 67.0 | 56.1                 | 56.2 | 26.6                | 26.9 | 16.1                              | 16.8 | 39.5                           | 38.3 |                                |      |
| benzene           | 73.1                    | 74.1 | 61.5                 | 61.4 | 11.7                | 10.8 | 7.9                               | 8.6  | 28.7                           | 27.0 |                                |      |
| benzyl alcohol    | 68.2                    | 66.4 | 59.4                 | 57.6 | 22.1                | 21.9 | 22.4                              | 22.7 | 43.6                           | 39.8 |                                |      |
| benzaldehyde      | 70.2                    | 71.6 | 60.0                 | 59.9 | 22.9                | 21.5 | 21.5                              | 23.6 | 29.2                           | 27.4 |                                |      |
| butane            | 67.7                    | 68.5 | 57.1                 | 58.7 | 23.7                | 23.6 | 10.8                              | 8.7  | 51.3                           | 45.1 | 3.7                            | 6.9  |
| butanol           | 64.1                    | 62.9 | 54.8                 | 53.9 | 28.9                | 29.2 | 22.6                              | 20.2 | 55.7                           | 51.2 | 17.9                           | 17.9 |
| 2-butoxyethanol   | 64.9                    | 65.8 | 55.3                 | 59.4 | 24.1                | 23.6 | 60.7                              | 54.8 | 72.6                           | 67.3 | 15.6                           | 29.7 |
| carbon dioxide    | 53.6                    | 50.3 | 42.3                 | 40.4 | 13.6                | 14.1 | 1.5                               | 1.5  |                                |      |                                |      |
| chloroform        | 80.6                    | 81.5 | 77.3                 | 77.4 | 21.3                | 21.3 | 20.7                              | 25.3 | 3.3                            | 4.4  |                                |      |
| cyclohexane       | 70.2                    | 70.1 | 64.2                 | 64.2 | 19.0                | 19.2 | 13.3                              | 11.6 | 53.4                           | 46.8 |                                |      |
| diazene           | 57.6                    | 54.9 | 32.4                 | 30.8 | 11.6                | 12.2 | 0.0                               | 0.0  | 23.4                           | 18.2 |                                |      |
| dichloromethane   | 80.3                    | 79.5 | 71.6                 | 71.4 | 23.4                | 23.4 | 6.8                               | 6.4  | 8.2                            | 10.2 |                                |      |
| diethanolamine    | 58.4                    | 58.7 | 48.1                 | 53.2 | 21.5                | 18.1 | 46.7                              | 42.9 | 65.6                           | 63.7 | 7.9                            | 19.9 |
| diethyl ether     | 69.3                    | 69.7 | 58.8                 | 59.4 | 21.9                | 21.5 | 23.1                              | 21.9 | 56.5                           | 55.9 | 7.7                            | 8.0  |
| DMFA              | 64.6                    | 64.8 | 56.7                 | 57.2 | 30.6                | 29.9 | 13.3                              | 22.3 | 48.5                           | 47.9 |                                |      |
| DMSO              | 62.1                    | 66.2 | 54.8                 | 58.5 | 25.6                | 25.9 | 7.9                               | 12.1 | 32.5                           | 39.6 |                                |      |
| 1,4-dioxane       | 66.6                    | 66.5 | 61.3                 | 61.0 | 27.6                | 27.9 | 13.7                              | 13.0 | 36.4                           | 30.6 |                                |      |
| ethane            | 55.0                    | 56.6 | 30.8                 | 32.0 | 12.2                | 12.0 | 0.0                               | 0.0  | 27.1                           | 26.6 |                                |      |
| ethanol           | 60.7                    | 59.7 | 48.7                 | 48.2 | 27.8                | 28.0 | 2.9                               | 2.6  | 36.9                           | 37.0 |                                |      |
| ethene            | 54.5                    | 58.8 | 29.7                 | 31.8 | 12.2                | 11.2 | 0.0                               | 0.0  | 17.3                           | 17.8 |                                |      |
| ethyl acetate     | 66.1                    | 67.7 | 58.7                 | 59.9 | 28.8                | 27.5 | 35.4                              | 33.3 | 51.0                           | 49.3 | 14.4                           | 13.9 |
| ethylamine        | 59.8                    | 62.0 | 47.4                 | 50.9 | 29.8                | 29.6 | 2.2                               | 2.3  | 41.0                           | 40.0 |                                |      |
| ethylene glycol   | 57.0                    | 56.5 | 45.2                 | 48.5 | 26.1                | 24.6 | 8.7                               | 10.9 | 35.2                           | 34.1 |                                |      |
| formamide         | 56.7                    | 56.3 | 44.1                 | 45.8 | 31.6                | 31.8 | 1.1                               | 1.0  | 17.2                           | 18.4 |                                |      |
| formic acid       | 61.1                    | 56.6 | 48.3                 | 43.5 | 30.5                | 32.1 | 1.3                               | 1.0  | 14.8                           | 11.7 |                                |      |
| furan             | 69.5                    | 71.7 | 60.1                 | 62.2 | 27.0                | 25.3 | 7.5                               | 7.1  | 18.5                           | 19.3 |                                |      |
| hexane            | 70.7                    | 71.2 | 60.7                 | 62.2 | 20.1                | 20.8 | 34.9                              | 30.9 | 75.1                           | 68.7 | 11.5                           | 18.0 |
| hexanol           | 65.7                    | 64.7 | 56.7                 | 56.2 | 25.5                | 26.0 | 45.8                              | 41.9 | 73.3                           | 66.5 | 20.5                           | 26.1 |
| hydrazine         | 51.4                    | 50.0 | 26.4                 | 26.9 | 12.0                | 12.1 | 0.0                               | 0.0  | 30.4                           | 26.9 |                                |      |
| hydrogen peroxide | 54.0                    | 53.8 | 29.0                 | 30.4 | 24.1                | 22.7 | 0.0                               | 0.0  | 18.7                           | 18.0 |                                |      |
| hydrogen sulfide  |                         | 60.6 |                      | 40.4 |                     |      |                                   |      |                                |      |                                |      |
| methane           | 40.2                    | 42.8 | 33.0                 | 35.3 |                     |      |                                   |      |                                |      |                                |      |
| methanethiol      | 71.0                    | 71.4 | 43.7                 | 43.6 | 16.9                | 16.1 | 0.0                               | 0.0  | 45.3                           | 41.3 |                                |      |
| methanol          | 58.9                    | 58.9 | 32.7                 | 32.7 | 14.6                | 14.6 | 0.0                               | 0.0  | 33.0                           | 33.0 |                                |      |
| methylamine       | 53.0                    | 55.8 | 27.6                 | 31.0 | 15.8                | 16.4 | 0.0                               | 0.0  | 31.3                           | 30.3 |                                |      |
| NMA               | 59.7                    | 61.7 | 52.3                 | 54.8 | 28.4                | 27.6 | 13.7                              | 13.3 | 50.5                           | 48.8 |                                |      |
| octanol           | 66.4                    | 65.7 | 57.3                 | 57.5 | 22.7                | 23.4 | 71.9                              | 66.0 | 90.6                           | 81.9 | 26.0                           | 36.3 |
| pentane           | 70.8                    | 71.4 | 60.8                 | 62.2 | 21.7                | 22.3 | 22.9                              | 20.4 | 66.4                           | 61.2 | 7.9                            | 12.6 |
| pentanol          | 65.1                    | 63.8 | 56.0                 | 55.2 | 27.2                | 27.6 | 33.8                              | 30.7 | 64.5                           | 58.9 | 16.9                           | 21.0 |
| piperidine        | 67.8                    | 67.0 | 61.0                 | 59.6 | 32.9                | 32.6 | 11.8                              | 11.5 | 60.8                           | 51.5 |                                |      |
| propane           | 62.2                    | 63.3 | 51.5                 | 52.8 | 25.6                | 25.5 | 1.2                               | 1.0  | 35.7                           | 33.7 |                                |      |
| propanol          | 62.9                    | 61.6 | 52.9                 | 51.8 | 29.5                | 29.5 | 12.1                              | 11.1 | 47.0                           | 43.7 | 8.9                            | 8.9  |
| pyridine          | 69.9                    | 70.5 | 59.4                 | 60.0 | 27.2                | 25.5 | 8.8                               | 9.6  | 25.2                           | 23.5 |                                |      |
| styrene           | 73.4                    | 75.7 | 61.6                 | 61.7 | 29.6                | 28.7 | 19.8                              | 21.7 | 38.6                           | 35.2 |                                |      |
| TBA               | 64.1                    | 63.1 | 57.2                 | 56.3 | 20.1                | 19.3 | 16.8                              | 15.1 | 60.1                           | 63.7 |                                |      |
| TFE               |                         | 77.0 |                      | 70.0 |                     | 18.5 |                                   | 41.6 |                                |      |                                |      |
| tetrahydrofuran   | 69.5                    | 71.8 | 60.1                 | 62.3 | 32.7                | 31.1 | 7.5                               | 7.1  | 18.5                           | 19.3 |                                |      |
| toluene           | 72.7                    | 74.0 | 61.4                 | 61.8 | 25.2                | 23.9 | 16.9                              | 17.7 | 47.7                           | 45.8 |                                |      |
| triethylamine     | 69.4                    | 69.9 | 63.2                 | 63.7 | 21.9                | 20.9 | 38.7                              | 38.6 | 79.3                           | 75.5 | 19.2                           | 26.1 |

|          |      |      |      |      |      |      |      |      |      |      |
|----------|------|------|------|------|------|------|------|------|------|------|
| m-xylene | 71.8 | 73.5 | 61.2 | 62.1 | 24.3 | 22.6 | 24.6 | 25.5 | 66.3 | 64.3 |
| o-xylene | 73.6 | 75.1 | 61.6 | 62.2 | 24.9 | 23.4 | 23.2 | 23.9 | 62.0 | 58.4 |
| p-xylene | 71.8 | 73.7 | 60.8 | 61.7 | 18.4 | 16.5 | 25.6 | 26.3 | 66.2 | 64.3 |

Table S4. Conformation Probabilities<sup>a</sup>

| Liquid               | $p_{\tau}$ |      | $p_{\sigma^-}$ |      | $p_{\sigma^+}$ |      |
|----------------------|------------|------|----------------|------|----------------|------|
|                      | OPLS       | GAFF | OPLS           | GAFF | OPLS           | GAFF |
| butane               | 0.88       | 0.69 | 0.88           | 0.15 | 0.06           | 0.15 |
| butanol              | 0.24       | 0.23 | 0.43           | 0.43 | 0.43           | 0.34 |
| (C terminus)         | 0.27       | 0.28 | 0.35           | 0.35 | 0.38           | 0.37 |
| 2-butoxyethanol      | 0.79       | 0.71 | 0.10           | 0.15 | 0.10           | 0.15 |
| (C terminus)         | 0.94       | 0.51 | 0.04           | 0.24 | 0.03           | 0.25 |
|                      | 0.86       | 0.88 | 0.07           | 0.06 | 0.07           | 0.06 |
|                      | 0.84       | 0.86 | 0.08           | 0.07 | 0.08           | 0.07 |
|                      | 1.00       | 0.04 | 0.00           | 0.48 | 0.00           | 0.48 |
| diethanolamine       | 1.00       | 0.10 | 0.00           | 0.50 | 0.00           | 0.41 |
|                      | 0.88       | 0.94 | 0.06           | 0.03 | 0.06           | 0.03 |
|                      | 0.84       | 0.95 | 0.09           | 0.03 | 0.07           | 0.03 |
|                      | 1.00       | 0.09 | 0.00           | 0.43 | 0.00           | 0.47 |
| diethyl ether        | 0.87       | 0.86 | 0.07           | 0.07 | 0.06           | 0.07 |
|                      | 0.87       | 0.86 | 0.06           | 0.07 | 0.07           | 0.07 |
| ethyl acetate        | 1.00       | 1.00 | 0.00           | 0.00 | 0.00           | 0.00 |
| (acetate C-terminus) | 0.00       | 0.00 | 0.50           | 0.50 | 0.50           | 0.50 |
|                      | 0.51       | 0.58 | 0.25           | 0.21 | 0.25           | 0.22 |
| hexane               | 0.87       | 0.73 | 0.07           | 0.13 | 0.06           | 0.13 |
|                      | 0.87       | 0.77 | 0.07           | 0.12 | 0.06           | 0.11 |
|                      | 0.86       | 0.75 | 0.07           | 0.13 | 0.07           | 0.12 |
| hexanol              | 0.86       | 0.75 | 0.07           | 0.13 | 0.07           | 0.12 |
| (C terminus)         | 0.87       | 0.76 | 0.07           | 0.12 | 0.07           | 0.11 |
|                      | 0.87       | 0.77 | 0.07           | 0.12 | 0.07           | 0.11 |
|                      | 0.43       | 0.51 | 0.29           | 0.24 | 0.28           | 0.25 |
| octanol              | 0.88       | 0.75 | 0.06           | 0.13 | 0.06           | 0.13 |
| (C terminus)         | 0.89       | 0.79 | 0.05           | 0.10 | 0.05           | 0.12 |
|                      | 0.90       | 0.80 | 0.05           | 0.10 | 0.05           | 0.10 |
|                      | 0.89       | 0.78 | 0.06           | 0.11 | 0.06           | 0.12 |
|                      | 0.88       | 0.77 | 0.06           | 0.11 | 0.06           | 0.12 |
|                      | 0.44       | 0.52 | 0.30           | 0.24 | 0.26           | 0.24 |
| pentane              | 0.86       | 0.74 | 0.07           | 0.13 | 0.07           | 0.13 |
|                      | 0.86       | 0.73 | 0.07           | 0.14 | 0.07           | 0.14 |
| pentanol             | 0.85       | 0.70 | 0.08           | 0.15 | 0.08           | 0.15 |
| (C terminus)         | 0.87       | 0.77 | 0.07           | 0.11 | 0.06           | 0.11 |
|                      | 0.44       | 0.50 | 0.28           | 0.25 | 0.28           | 0.25 |
| propanol             | 0.24       | 0.23 | 0.43           | 0.44 | 0.33           | 0.33 |
| triethylamine        | 0.43       | 0.39 | 0.11           | 0.27 | 0.46           | 0.34 |
|                      | 0.43       | 0.39 | 0.09           | 0.25 | 0.49           | 0.36 |
|                      | 0.43       | 0.39 | 0.08           | 0.27 | 0.48           | 0.34 |

<sup>a</sup> Dihedrals are ordered sequentially from the terminus given.

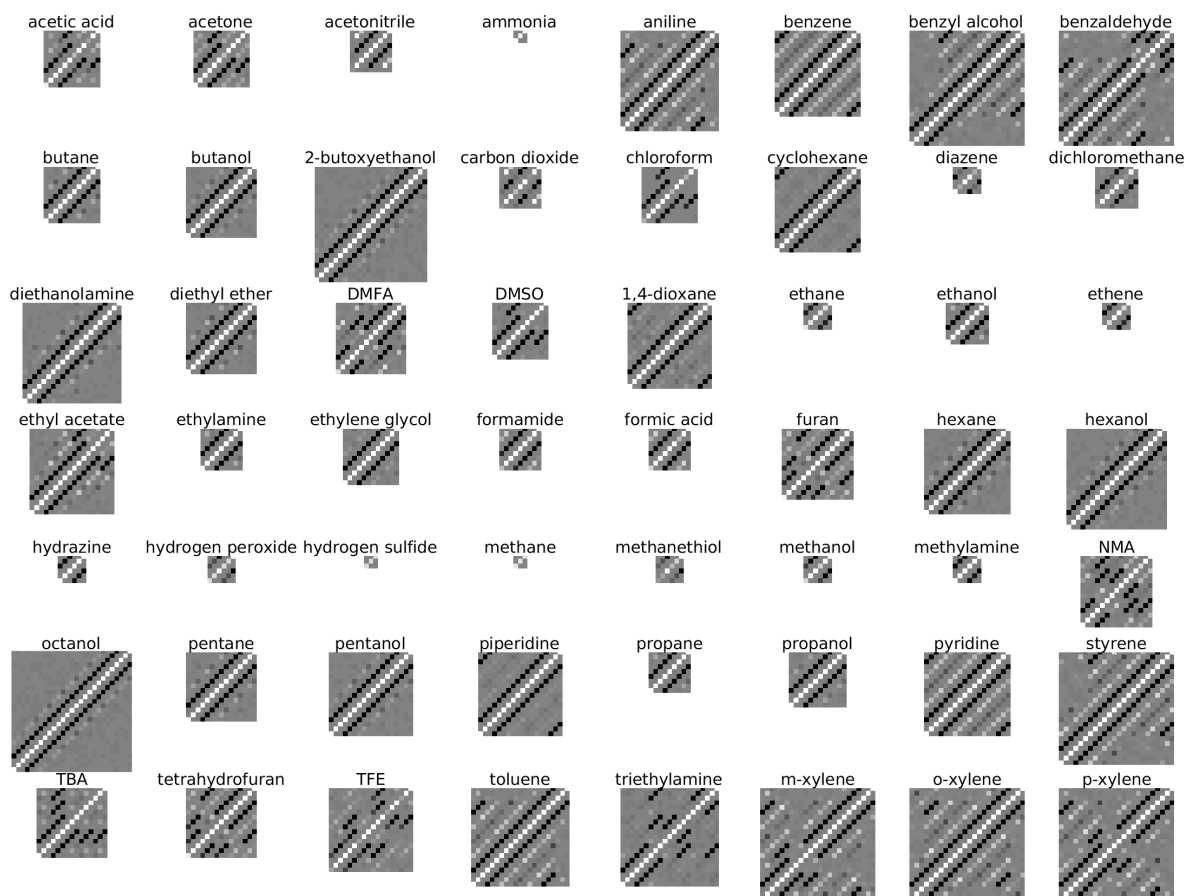

**Figure S1.** United-atom (UA) force covariance matrices for each liquid (GAFF), with the origin at the lower left. White and black represent correlations of 1 and  $-1$ , respectively, with grey in between.

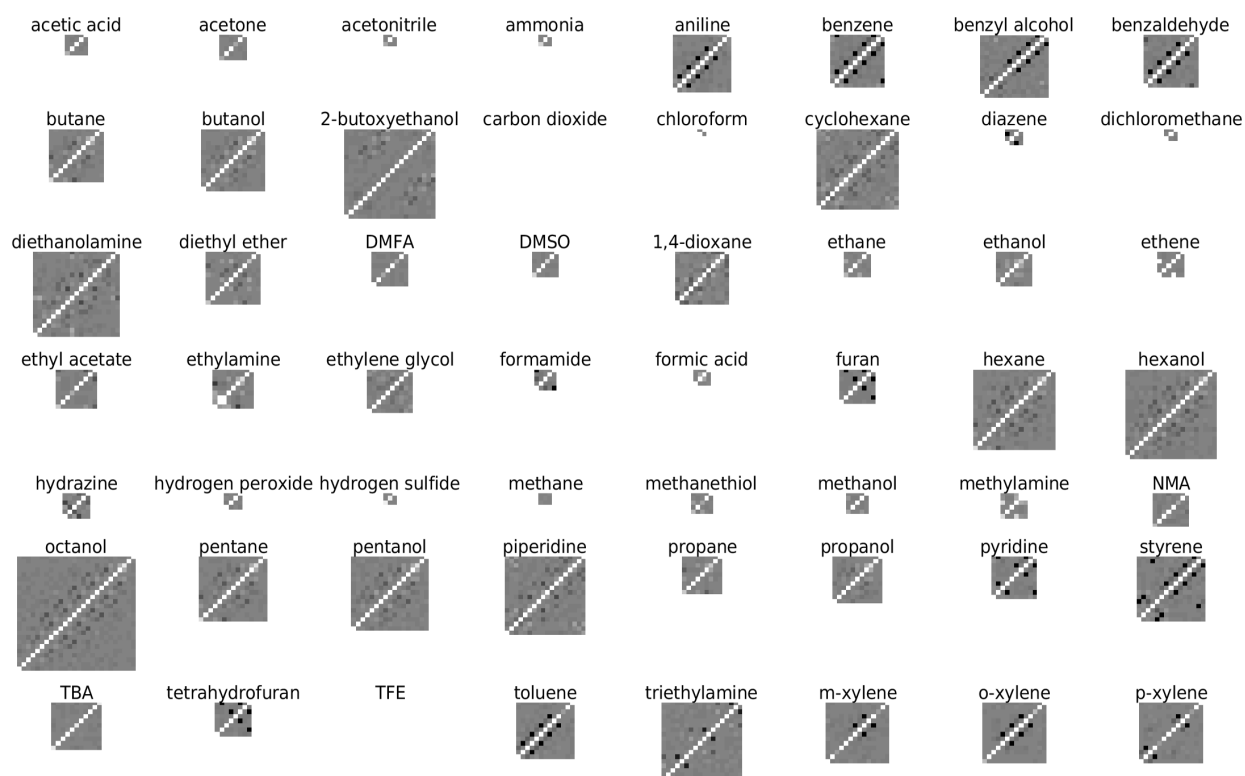

**Figure S2.** UA torque covariance matrices for each liquid and otherwise as for Figure S1.

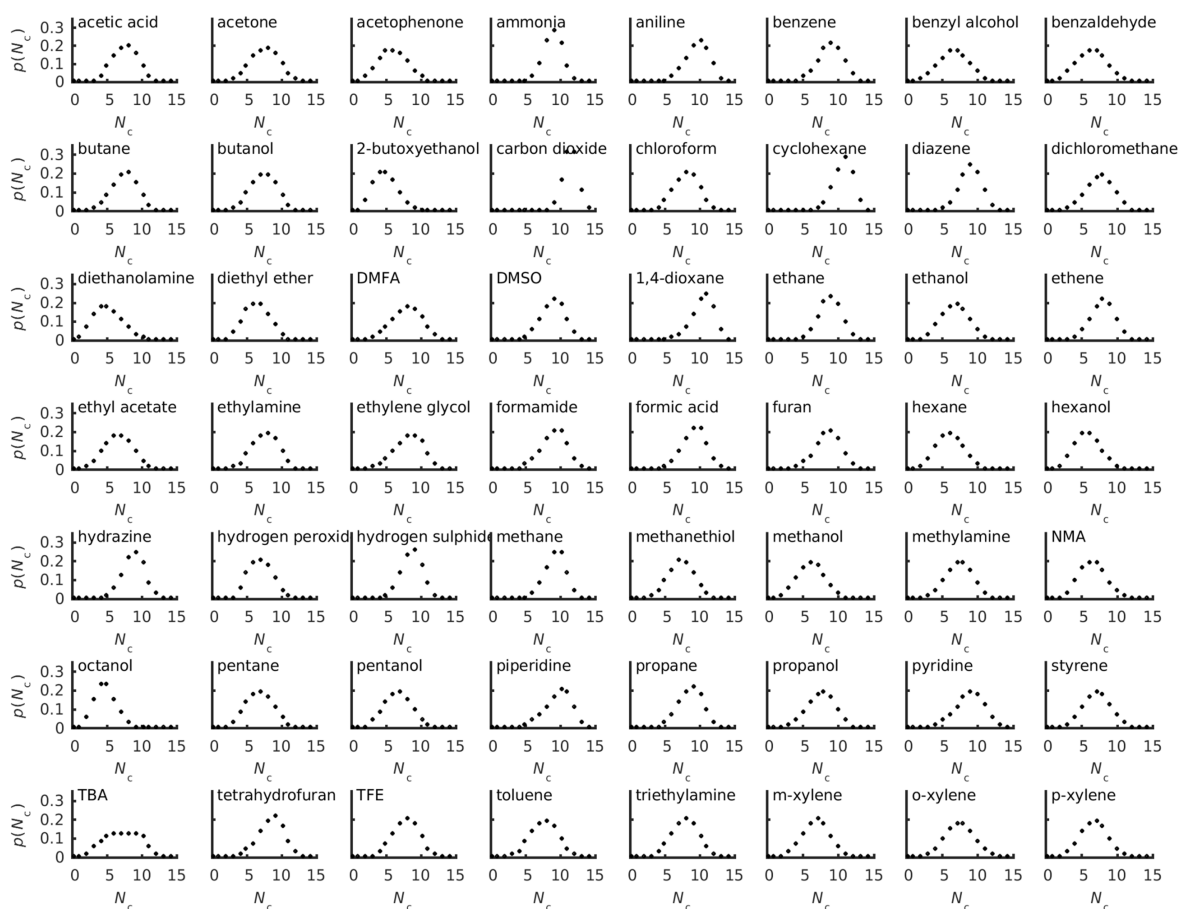

**Figure S3.** Probability distribution functions  $p(N_c)$  of coordination number  $N_c$  for each liquid (GAFF).

## References.

1. NIST Chemistry Webbook, Standard Reference Database Number 69, National Institute of Standards and Technology, <http://webbook.nist.gov/chemistry/>.
2. Stull, D.R.; Westrum Jr, E.F.; Sinke, G, C. *The Chemical Thermodynamics of Organic Compounds*; Wiley, 1969.
